# Supplementary material for: Quantifying nematic order in the evaporation-driven self-assembly of halloysite nanotubes: nematic islands and the critical aspect ratio
Source: Royal Society of Chemistry journal article supplement (doi:10.1039/d3sm01224g), 2023-01-01
Supplement: d3sm01224g7.pdf [file d3sm01224g7.pdf]

**Quantifying nematic order in evaporation-driven self-assembly of Halloysite nanotubes:  
Nematic islands and critical aspect ratio**

Arun Dadwal,<sup>a</sup> Meenu Prasher,<sup>\*b</sup> Pranesh Sengupta,<sup>b,c</sup> and Nitin Kumar<sup>\*a</sup>

<sup>a</sup>*Department of Physics, Indian Institute of Technology Bombay Powai, Mumbai 400076, India.*

<sup>b</sup>*Materials Science Division, Bhabha Atomic Research Centre, Mumbai 400085, India*

<sup>c</sup>*Homi Bhabha National Institute, Anushakti Nagar, Mumbai 400094, India*

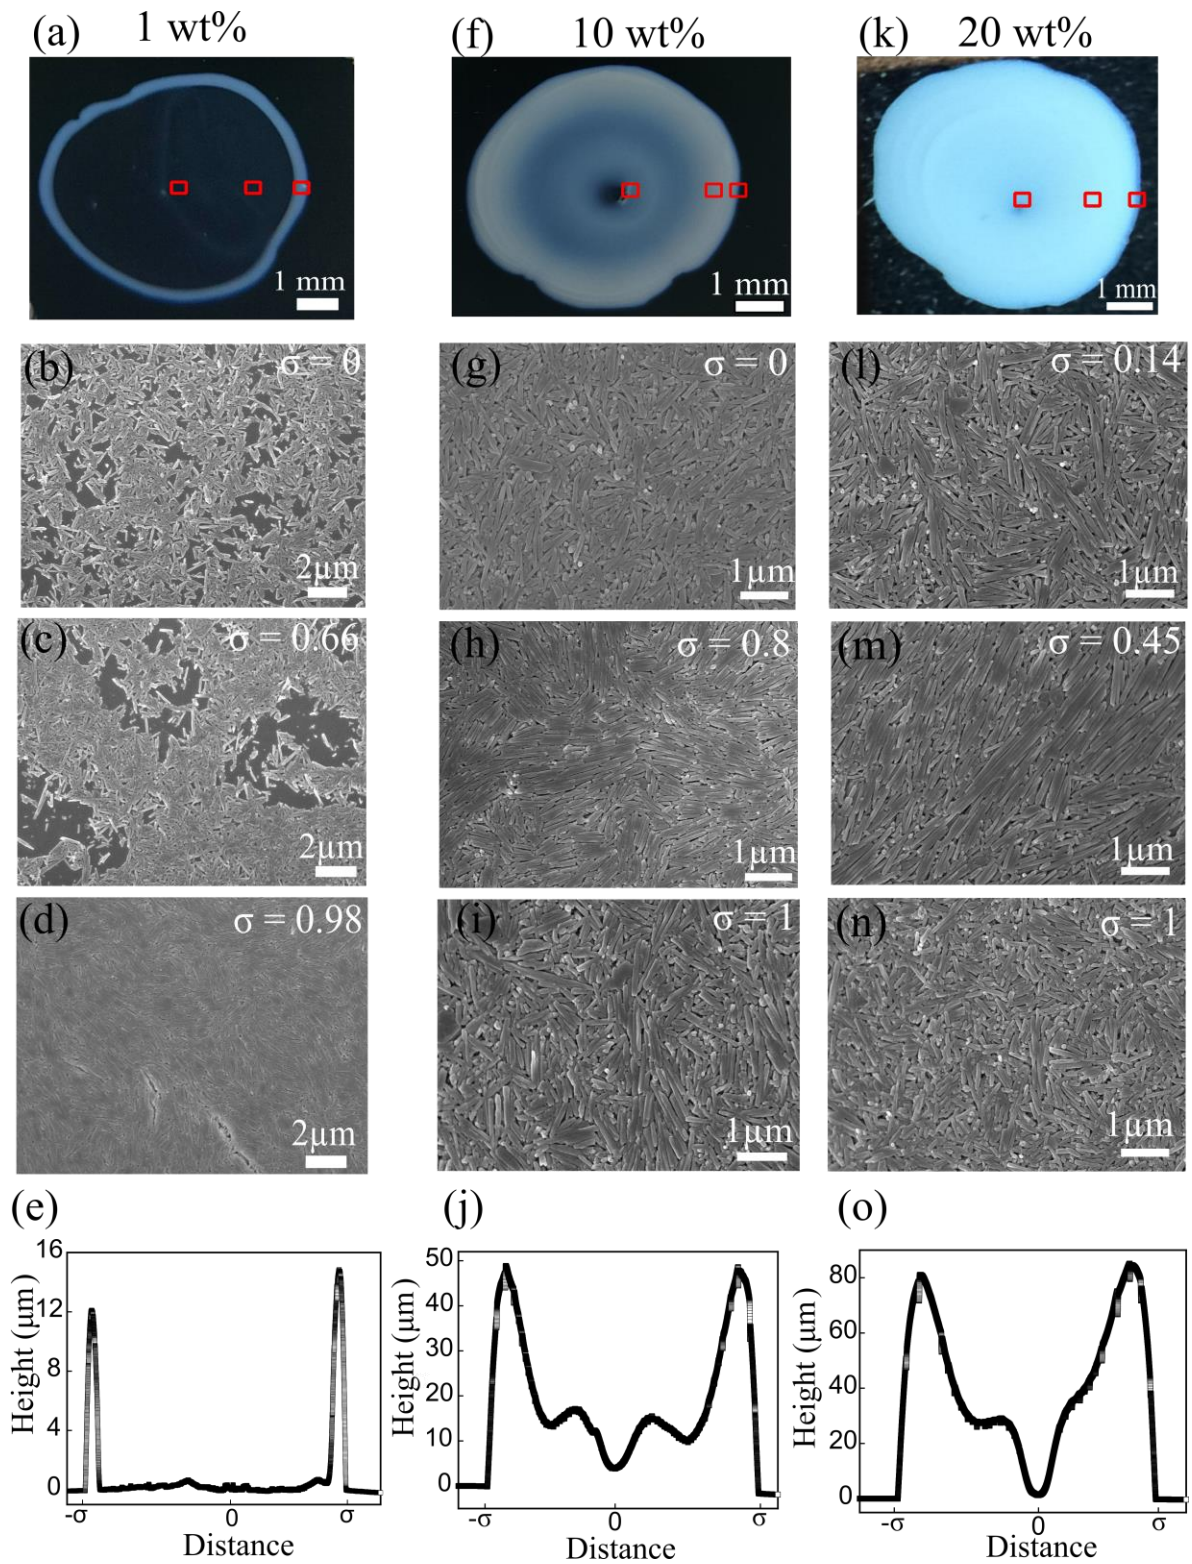

**Fig. S1:** Optical images of dried deposit, corresponding SEM images and height profiles at different  $\sigma$  for  $c = 1$  wt. % (a-e),  $c = 10$  wt. % (f-j) and  $c = 20$  wt. % (k-o) respectively.

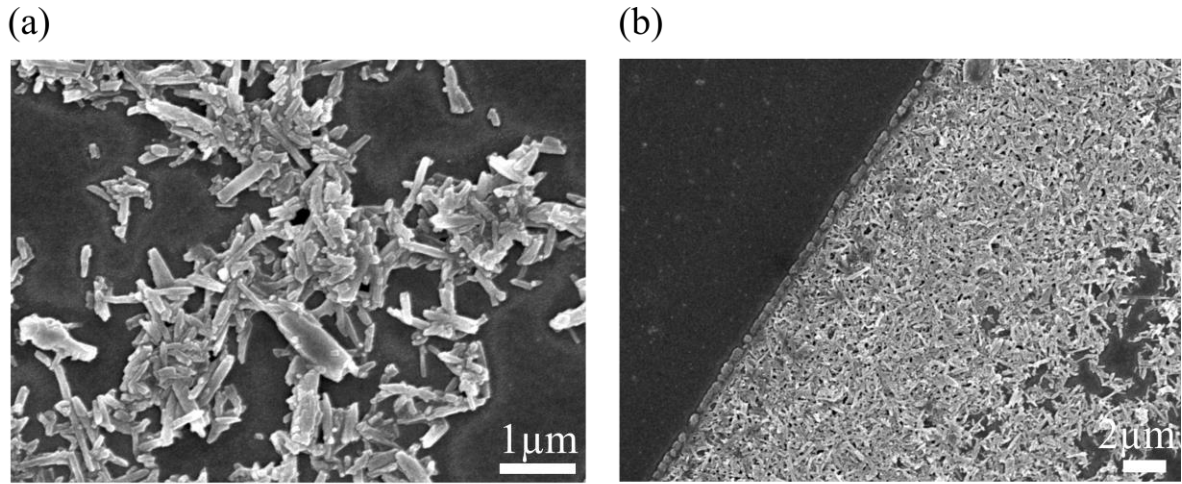

**Fig. S2:** SEM images of bare HNTs nanorods of  $c = 0.5$  wt% at the centre ( $\sigma \approx 0$ ) and at the edge ( $\sigma \approx 1$ ) respectively. Due to the pronounced tendency to form clusters, we do not see nematic order even at the edge of the coffee ring.

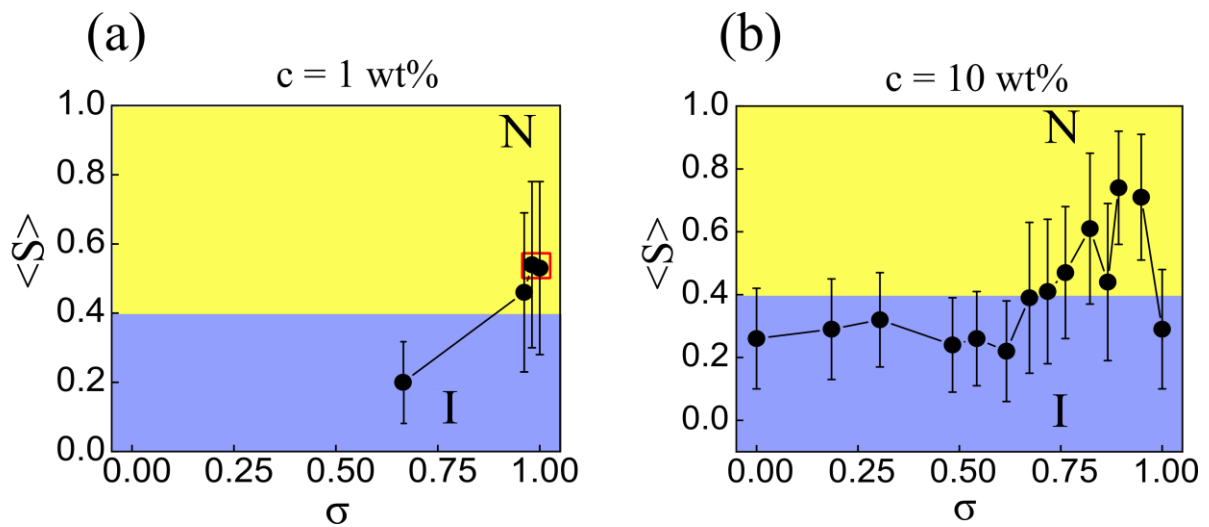

**Fig. S3:** Non-monotonic behaviour between  $S$  and  $\sigma$  emerges as we increase HNT concentration,  $c$ . (a)  $c = 1$  wt% (b)  $c = 10$  wt%.

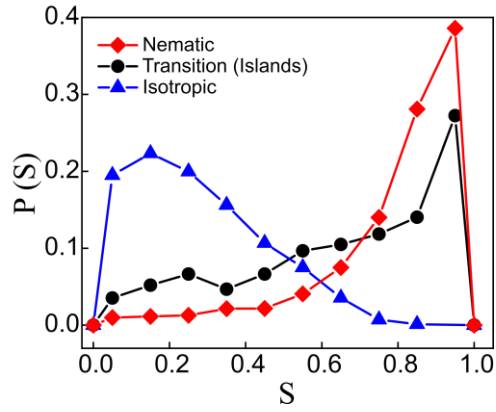

**Fig. S4:** Distribution of local nematic order  $P(S)$  for nematic, isotropic and transition phase in our experiments.

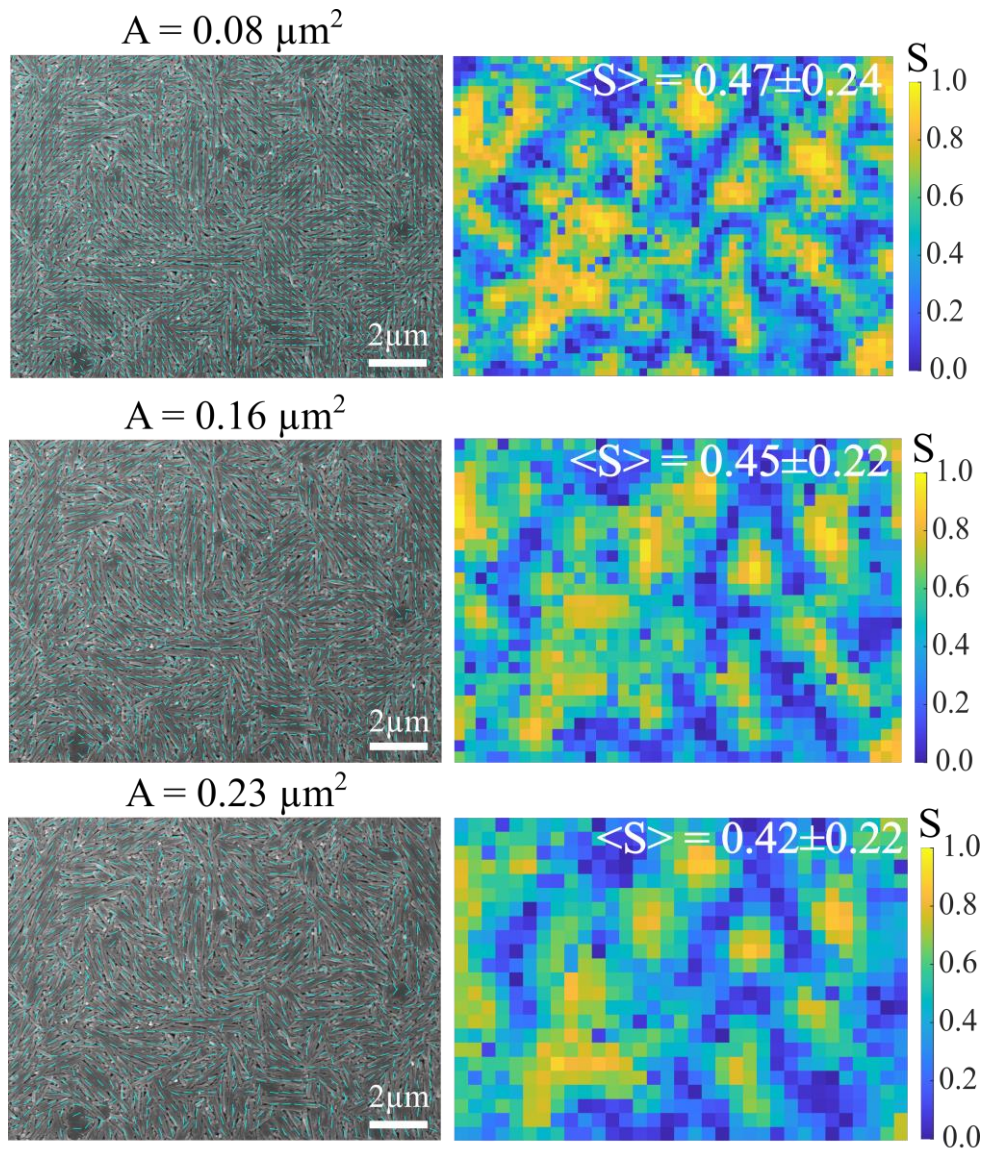

**Fig. S5:** The effect of grid area  $A$  for calculating  $S$  in an SEM image. Clearly, the resulting  $\langle S \rangle$  is independent of the choice of  $A$  over a range of  $0.08 - 0.23 \mu\text{m}^2$ .
