# Supplementary figures and images for: Quantifying nematic order in the evaporation-driven self-assembly of halloysite nanotubes: nematic islands and the critical aspect ratio
Source: Royal Society of Chemistry journal article supplement (doi:10.1039/d3sm01224g), 2023-01-01

(a) 1 wt%

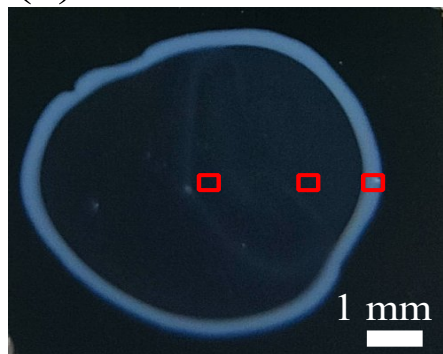

(h) 10 wt%

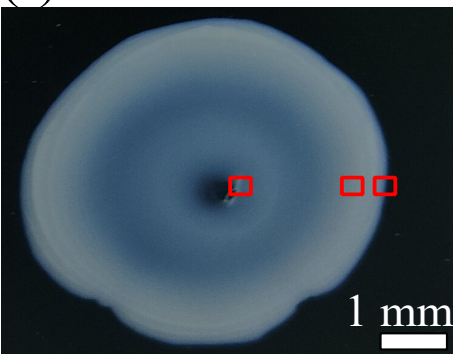

(k) 20 wt%

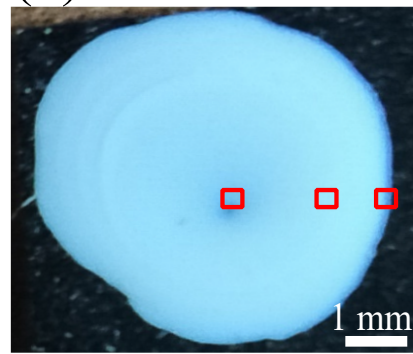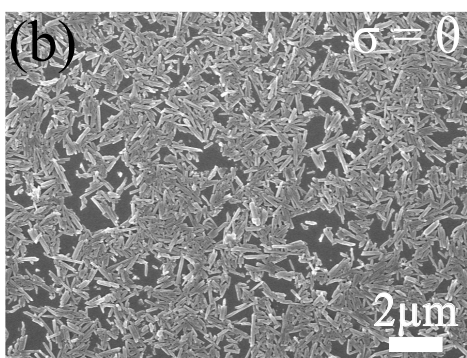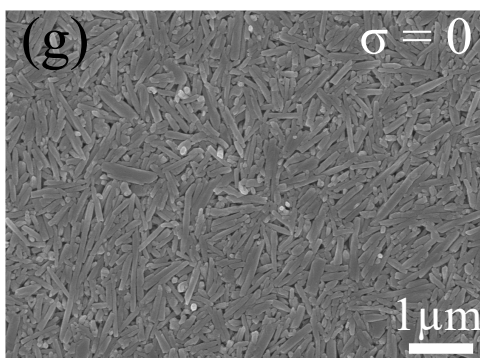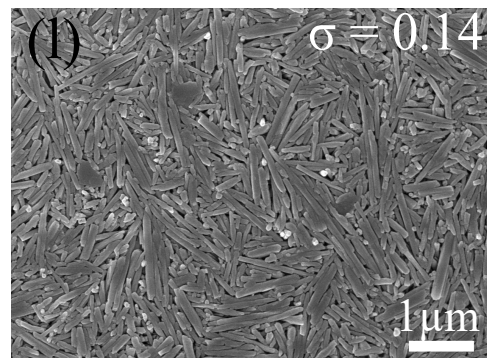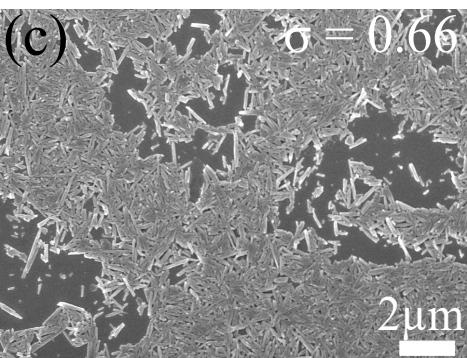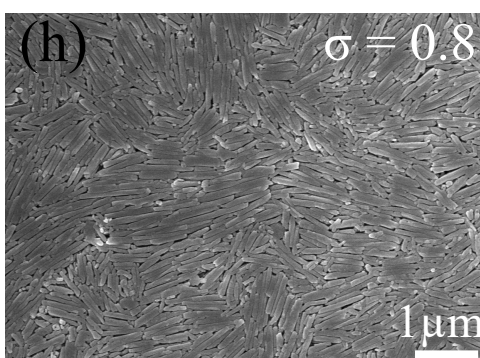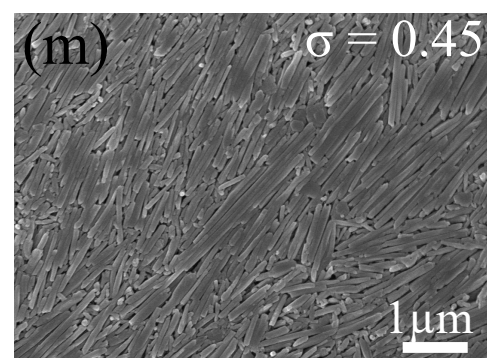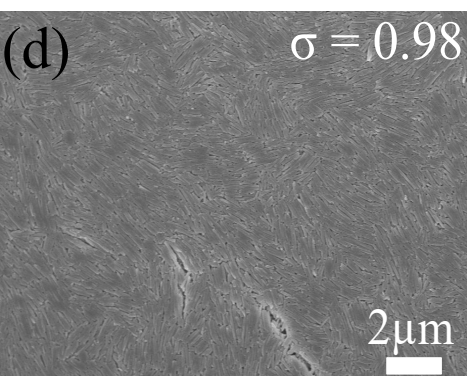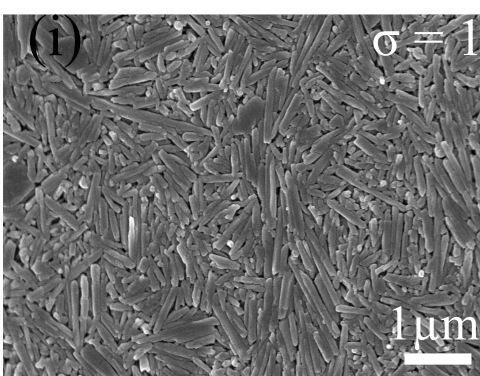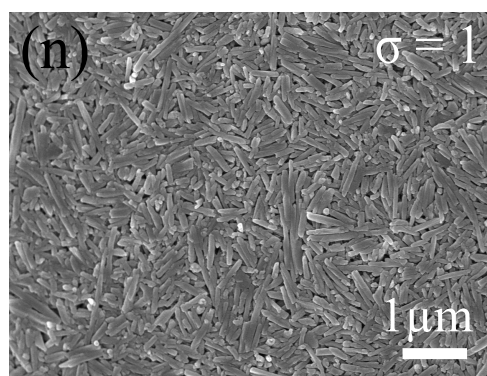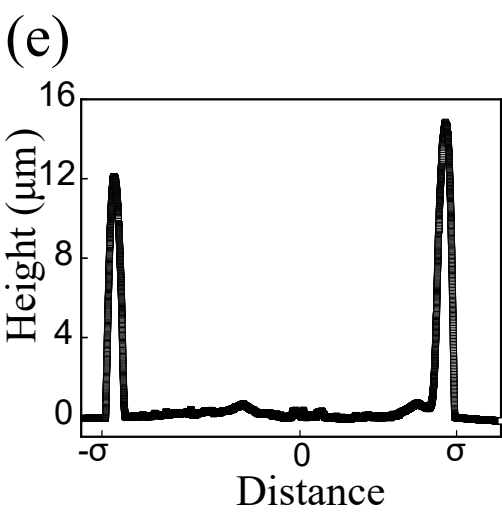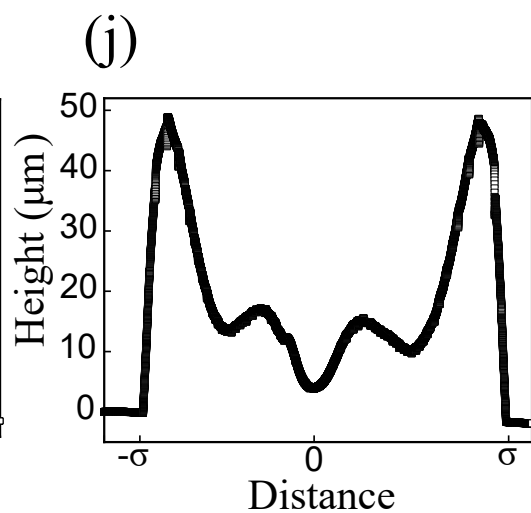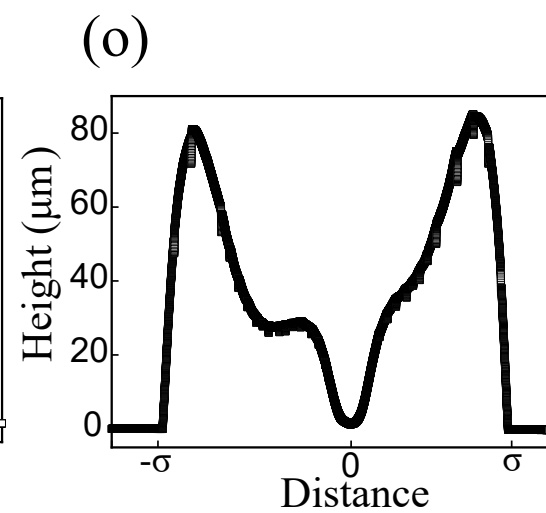

Supplement: d3sm01224g2.pdf [file d3sm01224g2.pdf]

(a)

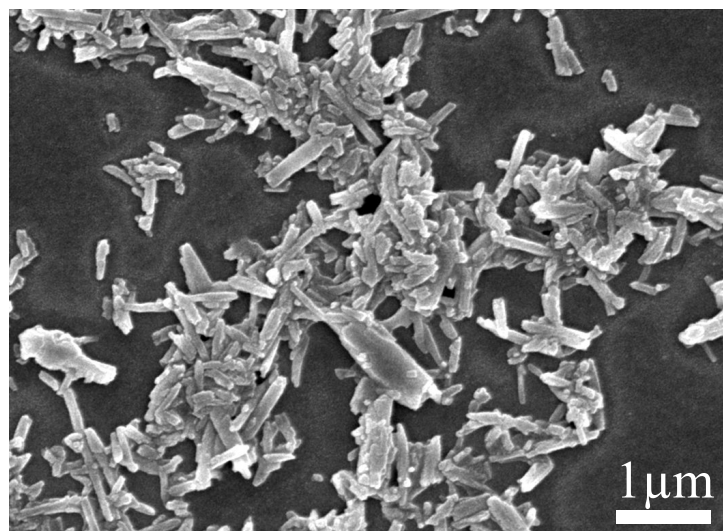

(b)

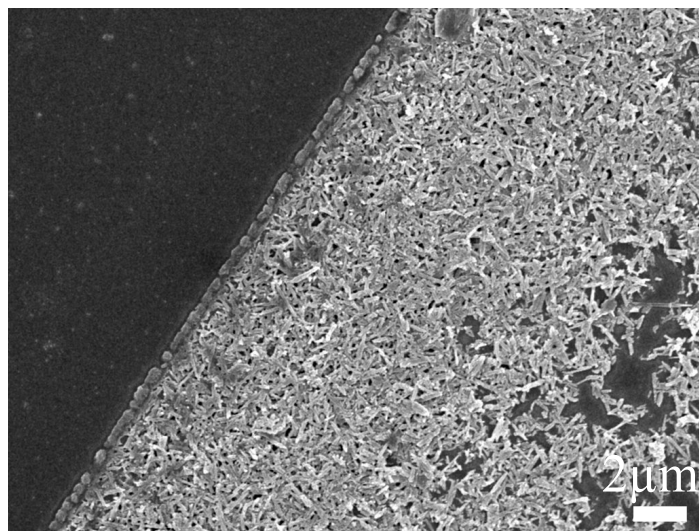

Supplement: d3sm01224g3.pdf [file d3sm01224g3.pdf]

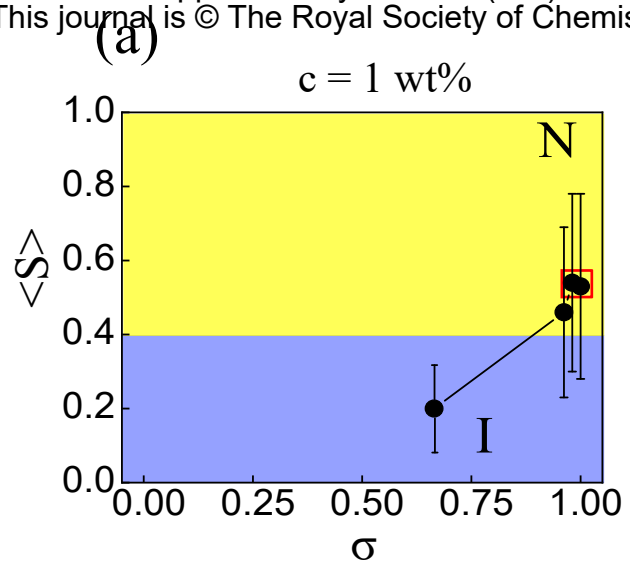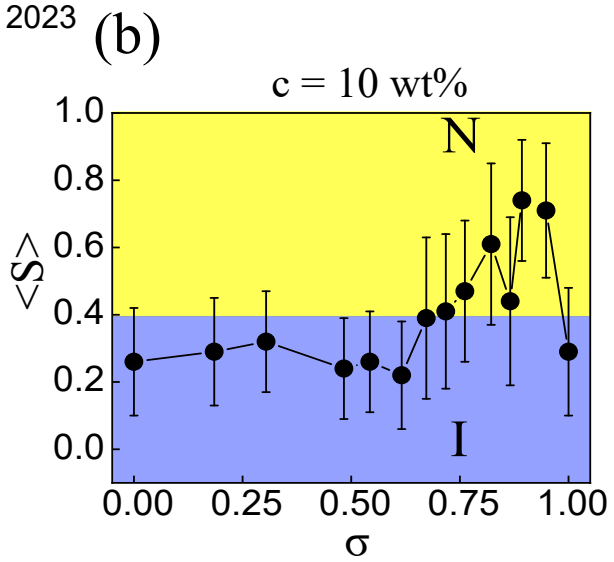

Supplement: d3sm01224g4.pdf [file d3sm01224g4.pdf]

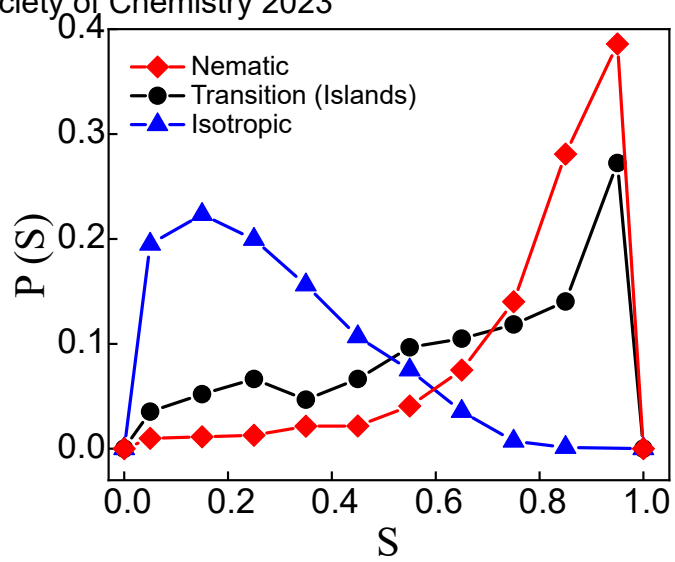

Supplement: d3sm01224g5.pdf [file d3sm01224g5.pdf]

$A = 0.08 \mu\text{m}^2$

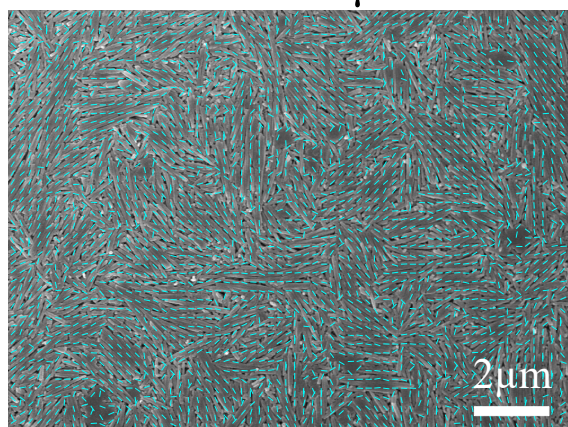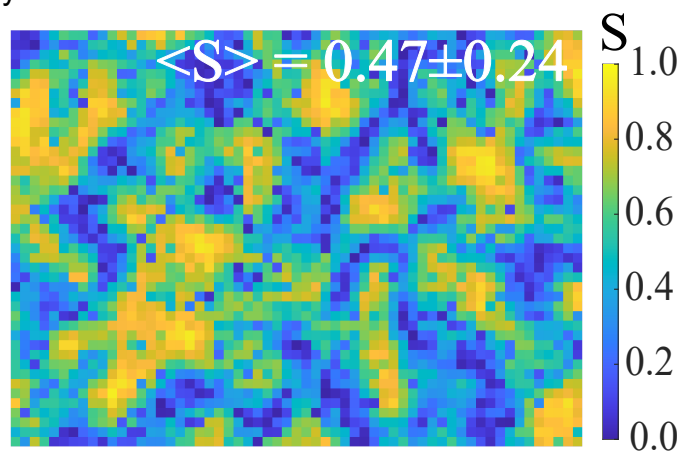

$A = 0.16 \mu\text{m}^2$

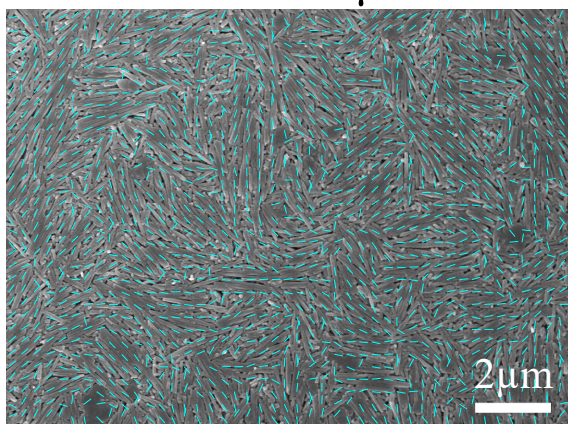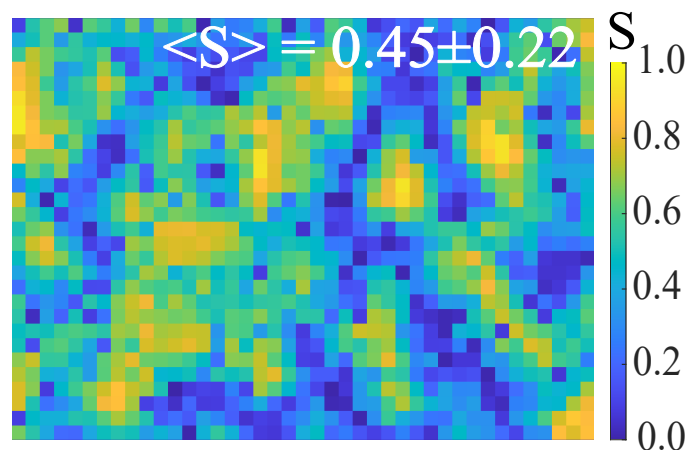

$A = 0.23 \mu\text{m}^2$

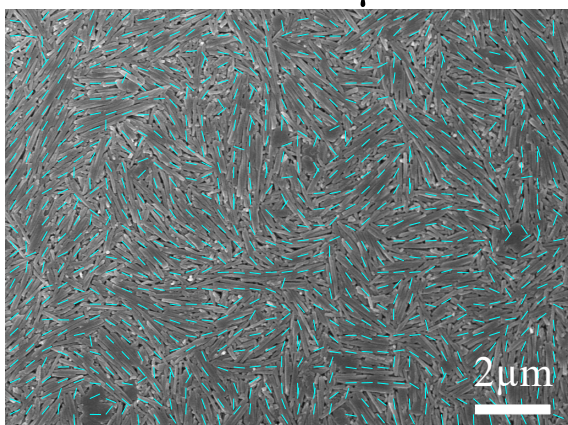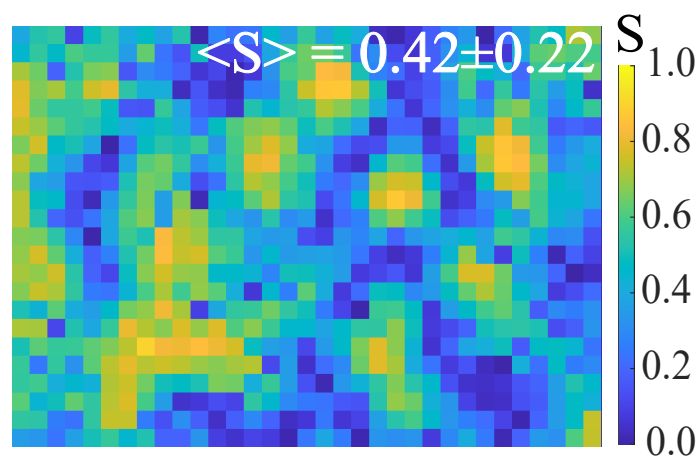

Supplement: d3sm01224g6.pdf [file d3sm01224g6.pdf]
